# Supplementary material for: Contrasting responses of summer precipitation to orbital forcing in Japan and China over the past 450 kyr
Source: Copernicus journal article supplement (doi:10.5194/cp-20-2017-2024), 2024-09-16
Supplement: Supplementary file 1 [file cp-20-2017-2024-supplement.zip]

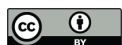

*Supplement of*

## **Contrasting responses of summer precipitation to orbital forcing in Japan and China over the past 450 kyr**

**Taiga Matsushita et al.**

*Correspondence to:* Mariko Harada ([harada.m.an@m.titech.ac.jp](mailto:harada.m.an@m.titech.ac.jp))

- [cp-20-2017-2024-supplement-title-page.pdf](#)
- [Matsushita\\_etal\\_CP\\_SI.pdf](#)
- [Matsushita\\_etal\\_CP\\_SI.xlsx](#)

The copyright of individual parts of the supplement might differ from the article licence.
