# Supplementary material for: Contrasting responses of summer precipitation to orbital forcing in Japan and China over the past 450 kyr
Source: Copernicus journal article supplement (doi:10.5194/cp-20-2017-2024), 2024-09-16
Supplement: Supplementary file 1 [file cp-20-2017-2024-supplement.zip]

## Sheet: fig2
		Insolation	SEC precipitation	SEC precipitation	SEC temperature	CLP precipitation	CLP precipitation	CLP temperature	JP precipitation	JP precipitation	JP temperature
unit	ka	W/m^2	mm/d	mm/d	K	mm/d	mm/d	K	mm/d	mm/d	K
area	-	20N-40N	105E-120E 24N-33N	105E-120E 24N-33N	105E-120E 24N-33N	100E-110E 34N-38N	100E-110E 34N-38N	100E-110E 34N-38N	130E-143E 30N-40N	130E-143E 30N-40N	130E-143E 30N-40N
season	-	JJA	JJA	Annual	JJA	JJA	Annual	JJA	JJA	Annual	JJA
anomaly	-	from PI	from PI	from PI	from PI	from PI	from PI	from PI	from PI	from PI	from PI
	0	0	0	0	0	0	0	0	0	0	0
	5	17.1904	1.04756	0.00146805	0.185187	0.481862	0.0696341	0.468638	-0.268071	-0.0701372	0.0978041
	10	29.1179	1.62504	0.112448	1.01199	1.30418	0.288209	1.49074	-0.652766	-0.147194	1.0824
	15	12.5056	1.0496	0.116114	1.13406	0.558003	0.126249	1.51238	-0.430824	-0.124818	1.33381
	20	-3.02566	0.155663	0.091673	0.103011	0.0459415	0.0334034	0.0898258	0.219565	0.105898	0.151244
	25	4.42011	0.251719	0.0137087	-0.484215	0.0532894	0.0122325	-0.730605	0.317261	0.103443	-0.518222
	30	19.7179	0.618091	0.0584195	0.527542	0.138026	0.0596144	0.692371	0.226256	0.0391538	0.31841
	35	16.0309	0.965918	0.167252	1.13496	0.218788	0.0561338	1.50374	0.447532	0.110581	1.04355
	40	6.6112	0.695876	0.0846337	0.805935	0.156162	0.00969009	0.975738	0.0718617	0.0174049	0.830092
	45	4.19254	0.657667	0.0102926	0.335426	0.233222	0.0622544	0.45428	-0.176702	-0.0051933	0.493105
	50	11.9152	0.972018	0.000939414	-0.0318138	0.764223	0.167666	0.0310505	-0.334265	-0.0208313	0.0534975
	55	23.8911	1.33965	0.0746727	0.633288	0.877772	0.14366	1.02337	-0.490487	-0.0738616	0.516963
	60	21.9412	1.0062	0.0815295	1.38518	0.512571	0.0474403	1.79901	-0.0807168	-0.0539303	1.26111
	65	2.7994	0.278975	0.122179	0.954621	0.0542982	0.0315314	1.06004	0.428111	0.0634028	0.870161
	70	-8.25598	0.0360325	0.209994	-0.486706	0.180136	0.0873555	-0.72598	0.508517	0.149031	-0.601249
	75	8.65541	0.257981	0.0438874	-0.521344	0.291635	0.103228	-0.777623	0.127247	0.0882361	-0.579223
	80	32.8677	1.46713	0.137299	1.12412	0.82728	0.183849	1.67034	-0.0742927	0.0122351	0.912988
	85	19.785	1.42355	0.160426	1.88966	0.985304	0.182927	2.39407	-0.237373	-0.0821919	2.08366
	90	-6.34929	0.277786	0.118085	0.921027	0.140698	0.0377882	0.98915	-0.0497451	0.081589	1.13802
	95	-6.94733	0.0442828	0.0138265	-1.06797	-0.092866	-0.0348264	-1.19108	-0.290444	0.131571	-0.876011
	100	28.9497	1.39134	0.113156	-0.261792	0.800753	0.137998	0.0250462	-0.640166	-0.130918	-0.346578
	105	37.8118	1.67724	0.223906	1.99914	0.877915	0.200535	2.71785	-0.205953	-0.152711	1.77234
	110	-3.00387	0.0760886	0.224464	1.47435	-0.0942194	-0.022279	1.60406	0.452308	0.100334	1.51111
	115	-22.2014	-0.340747	0.303868	-1.28625	0.299205	0.168647	-1.88893	0.356372	0.257626	-0.899737
	120	11.6362	0.519122	0.0366825	-1.00667	0.0562655	-0.0207585	-0.996528	0.112153	0.190167	-1.07696
	125	45.6766	1.86949	0.0846947	1.55744	1.42739	0.311621	2.27868	-0.712157	-0.222745	1.4394
	130	18.1099	1.34643	0.227032	2.01092	1.32258	0.251594	2.48776	-0.614669	-0.1729	2.3482
	135	-10.084	-0.0172254	0.0900065	0.648479	0.0195718	0.0196398	0.603389	0.144873	0.128955	0.804488
	140	-5.50709	0.0417096	0.0751609	-1.05781	0.144733	0.0628633	-1.38025	0.182126	0.136068	-0.9186
	145	23.7285	0.717016	3.0825e-05	0.0275352	0.313777	0.0197091	0.167488	-0.465465	-0.119728	-0.179879
	150	28.4387	1.05911	0.0945877	1.51641	0.442223	0.152288	1.9429	0.167738	-0.0343749	1.18216
	155	6.73721	0.549555	0.156219	1.37969	0.0970986	-0.00172701	1.57562	0.288811	0.0541635	1.34276
	160	-8.07234	0.0433156	0.139648	0.191504	-0.0701854	0.0130682	0.0770768	0.39904	0.19164	0.325489
	165	0.561385	0.26335	-0.00106482	-0.657087	0.131362	0.00309314	-0.815221	-0.227446	0.109292	-0.617765
	170	30.6551	1.63797	0.143071	0.102431	1.1054	0.187502	0.565892	-0.479955	-0.0672548	0.0593965
	175	36.2027	1.70544	0.153549	1.75656	1.48149	0.281517	2.46389	-0.808638	-0.241837	1.81216
	180	2.9692	0.465565	0.118731	1.64124	0.141997	0.0378411	1.86555	0.151929	9.16156e-05	1.78077
	185	-19.484	-0.311155	0.264314	-0.817736	0.407992	0.208806	-1.44878	0.202566	0.148674	-0.557155
	190	2.69189	0.0372909	0.111473	-1.34297	0.276759	0.113634	-1.88321	0.181598	0.171043	-1.32229
	195	43.6458	1.67969	0.127267	1.28317	0.995362	0.253249	1.80464	-0.162455	-0.0602854	0.973257
	200	19.705	1.11236	0.182575	2.25178	0.877046	0.119371	2.73262	-0.218824	-0.0424571	2.38984
	205	-15.7939	-0.298751	0.176847	0.782609	-0.179732	0.0625766	0.748124	0.436191	0.161522	0.903585
	210	-12.3994	-0.603839	-0.0141587	-1.32415	-0.0893539	0.00640683	-1.74394	-0.187669	0.13059	-1.23876
	215	36.2556	1.7397	0.144843	-0.266338	1.18671	0.214368	0.313558	-0.796458	-0.0694607	-0.173911
	220	44.6495	1.61934	0.116743	2.3665	1.72371	0.377411	3.27404	-1.0822	-0.282131	2.16397
	225	-2.34467	0.0896335	0.18575	1.63959	0.000676929	-0.0110077	1.9466	0.450523	0.112503	1.81387
	230	-24.8896	-0.791691	0.230209	-1.53142	0.572909	0.27612	-2.52077	-0.0386372	0.11679	-0.965345
	235	8.24956	0.220236	0.039898	-1.38995	0.279337	0.0782077	-1.72524	0.108098	0.0666609	-1.37558
	240	41.5044	1.8675	0.186234	1.44872	1.07676	0.197567	2.11068	-0.269684	-0.0586669	1.20866
	245	15.7257	1.11019	0.110352	1.89384	0.998492	0.150401	2.27696	-0.358545	-0.176578	2.17135
	250	-6.33531	0.205945	0.0486108	0.54968	0.0722423	0.00156545	0.663807	-0.111643	0.095683	0.729764
	255	0.590043	0.180378	0.0687017	-0.357424	0.0492216	-0.0182984	-0.280205	-0.391378	0.0763512	-0.270694
	260	21.8521	1.09314	0.0150986	0.357598	0.666444	0.105284	0.619951	-0.336248	-0.0096383	0.184953
	265	25.9213	1.19004	0.112206	0.918199	0.569061	0.0811848	1.42314	-0.372787	-0.0461967	0.886152
	270	11.8463	0.620368	0.134538	1.25604	0.20475	0.0826198	1.4416	0.381042	0.0140083	1.05404
	275	-3.87946	0.134118	0.122146	0.42026	0.0243851	0.0693692	0.384953	0.419157	0.126112	0.475833
	280	-3.99285	-0.00218484	0.112118	-0.678282	0.1885	0.0928839	-0.991427	0.262312	0.12625	-0.63031
	285	20.9698	0.785579	0.0155648	-0.208111	0.558426	0.0913154	-0.0478238	-0.472729	-0.0397065	-0.26597
	290	35.4173	1.70983	0.146054	1.65353	1.29411	0.252849	2.40908	-0.630734	-0.176378	1.72548
	295	10.0099	0.920897	0.180508	1.647	0.763651	0.150912	2.01735	-0.375575	-0.145269	1.87755
	300	-12.1257	-0.0593986	0.112039	-0.0697564	-0.0235261	0.0490514	-0.11718	0.0323512	0.0770436	0.182821
	305	2.70042	0.0103338	-0.0592336	-1.14267	0.103795	0.0254519	-1.41395	-0.177297	0.0241899	-0.982372
	310	36.2513	1.45052	0.126376	0.995627	0.763914	0.144802	1.52742	-0.15225	-0.0171327	0.710157
	315	18.62	0.906395	0.121561	2.03373	0.395138	0.0650257	2.42945	0.299402	-0.0206082	1.88175
	320	-11.1336	-0.0393639	0.225358	0.369197	0.00733324	0.0790366	0.296313	0.445514	0.224791	0.442507
	325	-4.68607	0.00175853	0.0507631	-0.856183	-0.035343	0.0207613	-1.16217	0.145218	0.125336	-0.77429
	330	30.9038	1.65522	0.129387	0.27811	1.07243	0.188698	0.821236	-0.554319	-0.0962056	0.283336
	335	31.5444	1.67127	0.07579	1.67486	1.51888	0.298284	2.28417	-0.571832	-0.217934	1.8194
	340	2.93692	0.537403	0.153507	1.16314	0.174159	0.0482402	1.39369	0.00580678	0.0531405	1.34138
	345	-6.16708	-0.152071	0.0309593	-0.539393	0.0758079	0.0748868	-0.894831	0.217895	0.0258893	-0.422497
	350	13.7253	0.551681	0.0433646	-0.244514	0.25491	0.0671568	-0.320014	0.239372	0.0448818	-0.413099
	355	20.2517	0.887354	0.0735284	1.05731	0.231995	0.0324299	1.42315	0.0890984	-0.0734116	0.854587
	360	6.60032	0.536973	0.154543	0.94423	0.0140479	0.0505981	1.06343	0.134924	-0.0265679	0.863043
	365	7.17813	0.496346	0.0145977	0.401743	0.0745471	0.0343789	0.641858	-0.203019	-0.087452	0.288647
	370	17.4954	1.32597	0.147933	0.61147	0.738628	0.123543	1.05083	-0.443939	-0.0885761	0.695163
	375	13.927	1.22409	0.114734	0.732672	0.628353	0.144066	0.978356	-0.304254	-0.107104	0.835135
	380	8.63949	0.731298	0.0291762	0.327701	0.245057	0.0445398	0.532917	-0.294978	-0.0473106	0.327848
	385	16.6155	0.878064	0.0766708	0.447102	0.327391	0.0466728	0.588401	-0.0818544	-0.0595406	0.337301
	390	15.5375	0.607258	0.0981658	1.09002	0.0373766	-0.00416357	1.48557	0.21389	-0.0588193	0.779674
	395	0.0265862	0.0523679	0.113831	0.425596	0.0350799	-0.0113457	0.458203	0.407683	0.0943348	0.381193
	400	1.66424	0.207643	0.125387	-0.382237	0.111421	0.146421	-0.546016	0.379898	0.097227	-0.465277
	405	21.5955	1.08679	0.0773355	0.654281	0.319142	0.0381016	1.09849	-0.0884663	0.0483269	0.57182
	410	19.6648	1.31877	0.114639	1.231	0.811763	0.144001	1.57772	-0.287096	-0.178852	1.38095
	415	5.43005	0.832599	0.112297	0.62455	0.38285	0.0703831	0.780598	-0.229914	-0.0444669	0.713205
	420	8.11166	0.755486	0.108364	0.200002	0.281369	0.0536019	0.374791	-0.528555	-0.02767	0.278137
	425	19.5374	1.02368	0.017655	0.586727	0.62382	0.151003	0.820152	-0.29717	-5.44958e-05	0.498051
	430	12.6918	0.574149	0.06568	1.0615	0.239426	0.0843746	1.22333	0.102502	-0.0806058	1.0169
	435	3.21295	0.273101	0.086563	0.275892	0.168169	0.0698199	0.194882	0.566256	0.0690744	0.162042
	440	11.2976	0.414909	0.0202861	0.138145	0.20112	0.0436982	0.183131	0.0951032	0.011914	0.00617317
	445	16.5423	0.704032	0.0215694	0.99461	0.26452	0.062202	1.2363	0.0822316	-0.0114904	0.944997
	450	6.31507	0.711634	0.105089	0.686465	0.377328	0.0675499	0.804938	0.16238	0.0939365	0.770618

## Sheet: fig3
		Insolation	SEC precipitation	CLP precipitation	JP precipitation
unit	ka	W/m^2	mm/d	mm/d	mm/d
area	-	20N-40N	105E-120E 24N-33N	100E-110E 34N-38N	130E-143E 30N-40N
season	-	JJA	JJA	JJA	JJA
anomaly	-	from PI	from PI	from PI	from PI
	0	0	0	0	0
	5	17.1904	1.04756	0.481862	-0.268071
	10	29.1179	1.62504	1.30418	-0.652766
	15	12.5056	1.0496	0.558003	-0.430824
	20	-3.02566	0.155663	0.0459415	0.219565
	25	4.42011	0.251719	0.0532894	0.317261
	30	19.7179	0.618091	0.138026	0.226256
	35	16.0309	0.965918	0.218788	0.447532
	40	6.6112	0.695876	0.156162	0.0718617
	45	4.19254	0.657667	0.233222	-0.176702
	50	11.9152	0.972018	0.764223	-0.334265
	55	23.8911	1.33965	0.877772	-0.490487
	60	21.9412	1.0062	0.512571	-0.0807168
	65	2.7994	0.278975	0.0542982	0.428111
	70	-8.25598	0.0360325	0.180136	0.508517
	75	8.65541	0.257981	0.291635	0.127247
	80	32.8677	1.46713	0.82728	-0.0742927
	85	19.785	1.42355	0.985304	-0.237373
	90	-6.34929	0.277786	0.140698	-0.0497451
	95	-6.94733	0.0442828	-0.092866	-0.290444
	100	28.9497	1.39134	0.800753	-0.640166
	105	37.8118	1.67724	0.877915	-0.205953
	110	-3.00387	0.0760886	-0.0942194	0.452308
	115	-22.2014	-0.340747	0.299205	0.356372
	120	11.6362	0.519122	0.0562655	0.112153
	125	45.6766	1.86949	1.42739	-0.712157
	130	18.1099	1.34643	1.32258	-0.614669
	135	-10.084	-0.0172254	0.0195718	0.144873
	140	-5.50709	0.0417096	0.144733	0.182126
	145	23.7285	0.717016	0.313777	-0.465465
	150	28.4387	1.05911	0.442223	0.167738
	155	6.73721	0.549555	0.0970986	0.288811
	160	-8.07234	0.0433156	-0.0701854	0.39904
	165	0.561385	0.26335	0.131362	-0.227446
	170	30.6551	1.63797	1.1054	-0.479955
	175	36.2027	1.70544	1.48149	-0.808638
	180	2.9692	0.465565	0.141997	0.151929
	185	-19.484	-0.311155	0.407992	0.202566
	190	2.69189	0.0372909	0.276759	0.181598
	195	43.6458	1.67969	0.995362	-0.162455
	200	19.705	1.11236	0.877046	-0.218824
	205	-15.7939	-0.298751	-0.179732	0.436191
	210	-12.3994	-0.603839	-0.0893539	-0.187669
	215	36.2556	1.7397	1.18671	-0.796458
	220	44.6495	1.61934	1.72371	-1.0822
	225	-2.34467	0.0896335	0.000676929	0.450523
	230	-24.8896	-0.791691	0.572909	-0.0386372
	235	8.24956	0.220236	0.279337	0.108098
	240	41.5044	1.8675	1.07676	-0.269684
	245	15.7257	1.11019	0.998492	-0.358545
	250	-6.33531	0.205945	0.0722423	-0.111643
	255	0.590043	0.180378	0.0492216	-0.391378
	260	21.8521	1.09314	0.666444	-0.336248
	265	25.9213	1.19004	0.569061	-0.372787
	270	11.8463	0.620368	0.20475	0.381042
	275	-3.87946	0.134118	0.0243851	0.419157
	280	-3.99285	-0.00218484	0.1885	0.262312
	285	20.9698	0.785579	0.558426	-0.472729
	290	35.4173	1.70983	1.29411	-0.630734
	295	10.0099	0.920897	0.763651	-0.375575
	300	-12.1257	-0.0593986	-0.0235261	0.0323512
	305	2.70042	0.0103338	0.103795	-0.177297
	310	36.2513	1.45052	0.763914	-0.15225
	315	18.62	0.906395	0.395138	0.299402
	320	-11.1336	-0.0393639	0.00733324	0.445514
	325	-4.68607	0.00175853	-0.035343	0.145218
	330	30.9038	1.65522	1.07243	-0.554319
	335	31.5444	1.67127	1.51888	-0.571832
	340	2.93692	0.537403	0.174159	0.00580678
	345	-6.16708	-0.152071	0.0758079	0.217895
	350	13.7253	0.551681	0.25491	0.239372
	355	20.2517	0.887354	0.231995	0.0890984
	360	6.60032	0.536973	0.0140479	0.134924
	365	7.17813	0.496346	0.0745471	-0.203019
	370	17.4954	1.32597	0.738628	-0.443939
	375	13.927	1.22409	0.628353	-0.304254
	380	8.63949	0.731298	0.245057	-0.294978
	385	16.6155	0.878064	0.327391	-0.0818544
	390	15.5375	0.607258	0.0373766	0.21389
	395	0.0265862	0.0523679	0.0350799	0.407683
	400	1.66424	0.207643	0.111421	0.379898
	405	21.5955	1.08679	0.319142	-0.0884663
	410	19.6648	1.31877	0.811763	-0.287096
	415	5.43005	0.832599	0.38285	-0.229914
	420	8.11166	0.755486	0.281369	-0.528555
	425	19.5374	1.02368	0.62382	-0.29717
	430	12.6918	0.574149	0.239426	0.102502
	435	3.21295	0.273101	0.168169	0.566256
	440	11.2976	0.414909	0.20112	0.0951032
	445	16.5423	0.704032	0.26452	0.0822316
	450	6.31507	0.711634	0.377328	0.16238

## Sheet: fig4
		Insolation	CLP temperature	CLP precipitation	Siberia1 SLP	Siberia2 SLP	NP	MC
unit	ka	W/m^2	K	mm/d	hPa	hPa	hPa	hPa
area	-	20N-40N	100E-110E 34N-38N	100E-110E 34N-38N	70E-120E 40N-60N	130E-150E 30N-60N	140E-170E 30N-50N	110E-160E 20S-10N
season	-	JJA	Annual	JJA	DJF	DJF	DJF	DJF
anomaly	-	from PI	from PI	from PI	from PI	from PI	from PI	from PI
	0	0	0	0	0	0	0	0
	5	17.1904	-0.258533	0.481862	0.4572	-0.326965	-0.538428	-0.0953774
	10	29.1179	-0.617793	1.30418	0.164112	-0.217185	-0.664019	-0.0367933
	15	12.5056	-0.364149	0.558003	-0.0143619	-0.0849359	-0.391488	0.108599
	20	-3.02566	0.133432	0.0459415	-0.542386	0.10819	0.0976566	-0.0296941
	25	4.42011	0.0277777	0.0532894	-0.496658	-0.433482	-0.116351	-0.0822348
	30	19.7179	0.0199006	0.138026	-0.520776	-0.0336986	0.0583057	-0.0641429
	35	16.0309	0.00108028	0.218788	-0.745392	-0.19378	-0.0062862	-0.107822
	40	6.6112	-0.186789	0.156162	-0.0894092	-0.243561	-0.301174	-0.013523
	45	4.19254	-0.211124	0.233222	0.322229	-0.62185	-1.11187	0.0391216
	50	11.9152	-0.643727	0.764223	0.460875	-0.0948927	-0.173354	-0.034231
	55	23.8911	-0.42566	0.877772	-0.00487454	-0.0508709	-0.0399475	-0.117076
	60	21.9412	-0.0798244	0.512571	-0.387668	-0.30009	-0.30767	-0.0426254
	65	2.7994	0.188694	0.0542982	-0.521399	-0.232841	-0.402124	0.101091
	70	-8.25598	0.300343	0.180136	-0.753459	0.30215	0.694199	-0.0699526
	75	8.65541	-0.0456286	0.291635	0.0445767	-0.233937	-0.132615	-0.0291127
	80	32.8677	-0.233069	0.82728	0.17201	-0.11142	-0.222385	-0.169695
	85	19.785	-0.237271	0.985304	-0.536848	-0.231785	-0.301861	0.107831
	90	-6.34929	0.124809	0.140698	-0.284914	-0.0622666	-0.283284	0.248085
	95	-6.94733	-0.307811	-0.092866	0.26582	0.0643263	0.357007	0.100705
	100	28.9497	-0.547408	0.800753	0.631671	-0.0541111	-0.0272416	0.0176261
	105	37.8118	-0.297998	0.877915	-0.64743	-0.61938	-1.19947	0.0944932
	110	-3.00387	0.290823	-0.0942194	-1.0942	-0.0619157	-0.22882	0.131494
	115	-22.2014	0.386923	0.299205	-0.912856	0.249551	0.734978	0.252932
	120	11.6362	-0.0409398	0.0562655	0.288453	0.0570637	0.773334	-0.0227349
	125	45.6766	-0.545196	1.42739	0.15744	-0.497974	-0.638822	-0.0236949
	130	18.1099	-0.373488	1.32258	-0.749315	-0.326599	-0.804298	0.288262
	135	-10.084	0.170551	0.0195718	-0.225803	0.214439	0.441684	0.146112
	140	-5.50709	-0.0270309	0.144733	0.313772	0.301454	0.716643	0.00558845
	145	23.7285	-0.109321	0.313777	0.159783	0.116388	0.300722	-0.0495247
	150	28.4387	-0.106816	0.442223	-0.464394	-0.518548	-0.818252	-0.0175234
	155	6.73721	0.0961544	0.0970986	-0.518549	-0.251955	-0.657517	-0.00280704
	160	-8.07234	0.148282	-0.0701854	-0.684163	-0.0279333	0.421288	0.0506416
	165	0.561385	-0.258275	0.131362	0.276361	0.0649473	0.332193	0.00128744
	170	30.6551	-0.567222	1.1054	0.730704	-0.103219	0.0224604	-0.0915573
	175	36.2027	-0.555498	1.48149	0.0446988	-0.257404	-0.53577	0.0255923
	180	2.9692	0.171559	0.141997	-0.89681	-0.166066	-0.417385	0.251308
	185	-19.484	0.342918	0.407992	-0.82803	0.492949	1.22563	0.225978
	190	2.69189	0.063402	0.276759	0.0277368	0.0015067	0.402871	0.021388
	195	43.6458	-0.253443	0.995362	0.0611865	-0.463635	-0.652654	-0.0354581
	200	19.705	-0.0823912	0.877046	-0.937757	-0.0809842	-0.349677	0.180962
	205	-15.7939	0.346694	-0.179732	-0.714103	0.120719	0.0794067	0.371726
	210	-12.3994	-0.160218	-0.0893539	0.121706	0.0305981	0.260918	0.229676
	215	36.2556	-0.589491	1.18671	0.948951	0.0318419	-0.206727	0.0283473
	220	44.6495	-0.485579	1.72371	0.0246568	-0.385031	-0.510188	0.102972
	225	-2.34467	0.227986	0.000676929	-1.00177	-0.0441013	-0.30367	0.187189
	230	-24.8896	0.347277	0.572909	-0.94974	0.40979	1.20104	0.250901
	235	8.24956	0.173567	0.279337	-0.479159	0.155793	0.860116	-0.132713
	240	41.5044	-0.284381	1.07676	0.151693	-0.421881	-0.634803	0.0568461
	245	15.7257	-0.280929	0.998492	-0.294615	-0.430012	-1.00421	0.207614
	250	-6.33531	0.028864	0.0722423	-0.280575	0.236472	-0.0870524	0.119622
	255	0.590043	-0.0987343	0.0492216	0.112544	0.181109	0.237337	0.129516
	260	21.8521	-0.280507	0.666444	0.258897	-0.340733	-0.391148	0.0301836
	265	25.9213	-0.358028	0.569061	-0.156574	-0.17375	-0.280149	0.00610429
	270	11.8463	0.122652	0.20475	-0.516186	-0.263877	-0.453415	0.092812
	275	-3.87946	0.290442	0.0243851	-0.653618	0.11059	0.168048	0.0231802
	280	-3.99285	-0.0111904	0.1885	-0.219863	-0.153118	0.375603	-0.0115861
	285	20.9698	-0.427282	0.558426	-0.1432	-0.376628	-0.270136	-0.0701942
	290	35.4173	-0.276665	1.29411	0.309649	-0.365423	-1.03509	0.0364429
	295	10.0099	-0.132531	0.763651	-0.565167	-0.275327	-0.631299	0.061448
	300	-12.1257	0.16304	-0.0235261	-0.183674	-0.156165	-0.0162592	0.0695099
	305	2.70042	-0.112958	0.103795	0.000575715	0.067842	0.376776	0.0214705
	310	36.2513	-0.110994	0.763914	0.00914443	-0.324715	-0.393735	-0.0246891
	315	18.62	0.0282825	0.395138	-0.918326	-0.246277	-0.63398	0.0967958
	320	-11.1336	0.393618	0.00733324	-0.868918	0.159061	0.668179	0.0200565
	325	-4.68607	-0.0419204	-0.035343	0.161732	0.129528	0.30585	0.0491724
	330	30.9038	-0.474038	1.07243	0.650387	-0.194033	-0.435005	-0.0428551
	335	31.5444	-0.528078	1.51888	0.152035	-0.017783	-0.451195	0.188887
	340	2.93692	0.00874065	0.174159	-0.307976	0.000297092	-0.117503	0.0953692
	345	-6.16708	0.0882241	0.0758079	-0.414918	0.142157	0.0940209	-0.00187343
	350	13.7253	0.0482192	0.25491	-0.159873	-0.339927	-0.0332757	-0.184363
	355	20.2517	-0.0359649	0.231995	-0.532431	-0.501862	-0.420864	-0.0515203
	360	6.60032	0.217824	0.0140479	-0.645297	-0.244221	-0.20414	0.021761
	365	7.17813	-0.0594181	0.0745471	-0.202584	-0.393063	-0.443443	0.025538
	370	17.4954	-0.356309	0.738628	0.0708881	-0.192013	-0.335317	-0.0599421
	375	13.927	-0.450925	0.628353	0.10772	-0.308296	-0.68191	-0.0308945
	380	8.63949	-0.191133	0.245057	0.0655651	-0.0987423	-0.145301	0.0414068
	385	16.6155	-0.216214	0.327391	-0.352659	-0.392253	-0.145582	-0.111374
	390	15.5375	0.0186317	0.0373766	-0.234041	-0.116829	-0.329834	-0.0283423
	395	0.0265862	0.283622	0.0350799	-0.644382	-0.0763507	0.321152	0.0416176
	400	1.66424	0.13164	0.111421	-0.853803	0.141699	0.647435	-0.102781
	405	21.5955	-0.0958828	0.319142	0.241952	-0.20799	-0.321954	-0.104044
	410	19.6648	-0.272887	0.811763	-0.129026	-0.1175	-0.600936	0.130152
	415	5.43005	-0.22863	0.38285	-0.20213	-0.311211	-0.563064	0.10093
	420	8.11166	-0.278681	0.281369	0.323735	-0.0558347	-0.0745516	-0.0883885
	425	19.5374	-0.360626	0.62382	0.301672	-0.00369693	0.125259	0.000892673
	430	12.6918	0.0151163	0.239426	-0.0291061	-0.515522	-0.621631	-0.120256
	435	3.21295	0.137384	0.168169	-0.476772	-0.241515	-0.450706	-0.0903009
	440	11.2976	-0.0539694	0.20112	-0.495043	-0.486407	-0.56213	-0.175171
	445	16.5423	-0.187828	0.26452	-0.343641	-0.277222	-0.332709	-0.00965093
	450	6.31507	-0.121166	0.377328	-0.345801	-0.176376	-0.202621	-0.0397303

## Sheet: fig5
		Insolation	JP precipitation	JP precipitation	JP precipitation	JP temperature range
unit	ka	W/m^2	mm/d	mm/d	mm/d	K
area	-	20N-40N	130E-143E 30N-40N	130E-143E 30N-40N	130E-143E 30N-40N	130E-143E 30N-40N
season	-	JJA	AMJJAS	ONDJFM	JJA	Tvar
anomaly	-	from PI	from PI	from PI	from PI	-
	0	0	0	0	0	15.8924
	5	17.1904	-0.0960052	-0.0442692	-0.268071	17.0224
	10	29.1179	-0.19011	-0.104277	-0.652766	18.9181
	15	12.5056	-0.120811	-0.128825	-0.430824	18.6697
	20	-3.02566	0.180454	0.0313418	0.219565	15.9072
	25	4.42011	0.103294	0.103592	0.317261	15.1359
	30	19.7179	0.0669139	0.0113937	0.226256	16.4312
	35	16.0309	0.27094	-0.0497774	0.447532	17.271
	40	6.6112	0.136202	-0.101392	0.0718617	17.255
	45	4.19254	-0.0263791	0.0159925	-0.176702	17.0279
	50	11.9152	-0.128143	0.0864808	-0.334265	17.0578
	55	23.8911	-0.158348	0.010625	-0.490487	17.6462
	60	21.9412	-0.00647628	-0.101384	-0.0807168	18.1244
	65	2.7994	0.163943	-0.0371373	0.428111	16.4712
	70	-8.25598	0.183778	0.114284	0.508517	14.1479
	75	8.65541	-0.0149957	0.191468	0.127247	15.2971
	80	32.8677	0.0919012	-0.067431	-0.0742927	18.1168
	85	19.785	0.0516801	-0.216064	-0.237373	19.0138
	90	-6.34929	0.131385	0.0317928	-0.0497451	17.2529
	95	-6.94733	-0.0183476	0.281489	-0.290444	14.9961
	100	28.9497	-0.3914	0.129563	-0.640166	16.8752
	105	37.8118	-0.0217241	-0.283699	-0.205953	19.1659
	110	-3.00387	0.251181	-0.0505124	0.452308	17.1204
	115	-22.2014	0.142856	0.372396	0.356372	12.6648
	120	11.6362	0.0798347	0.300498	0.112153	14.8954
	125	45.6766	-0.302297	-0.143194	-0.712157	19.2145
	130	18.1099	-0.0879004	-0.257899	-0.614669	19.8327
	135	-10.084	0.183068	0.0748416	0.144873	16.5754
	140	-5.50709	0.0936308	0.178505	0.182126	14.4676
	145	23.7285	-0.235294	-0.00416228	-0.465465	16.6048
	150	28.4387	0.15322	-0.22197	0.167738	18.2084
	155	6.73721	0.2156	-0.107273	0.288811	17.5416
	160	-8.07234	0.302998	0.0802829	0.39904	15.6441
	165	0.561385	0.011188	0.207395	-0.227446	15.455
	170	30.6551	-0.139267	0.00475738	-0.479955	17.4337
	175	36.2027	-0.321956	-0.161717	-0.808638	19.8442
	180	2.9692	0.181342	-0.181158	0.151929	18.0058
	185	-19.484	-0.0234818	0.320829	0.202566	13.3077
	190	2.69189	0.0546299	0.287456	0.181598	14.0775
	195	43.6458	-0.0408942	-0.0796765	-0.162455	18.2383
	200	19.705	0.139792	-0.224706	-0.218824	19.1196
	205	-15.7939	0.297041	0.0260028	0.436191	16.2867
	210	-12.3994	-0.0738884	0.335069	-0.187669	14.1221
	215	36.2556	-0.405841	0.26692	-0.796458	17.8492
	220	44.6495	-0.420897	-0.143365	-1.0822	20.1214
	225	-2.34467	0.269137	-0.0441307	0.450523	17.6253
	230	-24.8896	-0.112641	0.34622	-0.0386372	12.0412
	235	8.24956	-0.0375976	0.170919	0.108098	13.9179
	240	41.5044	0.00759191	-0.124926	-0.269684	18.6908
	245	15.7257	-0.0467334	-0.306423	-0.358545	19.2984
	250	-6.33531	0.136526	0.0548396	-0.111643	16.9775
	255	0.590043	-0.107821	0.260524	-0.391378	15.8809
	260	21.8521	-0.0500811	0.0308045	-0.336248	17.2871
	265	25.9213	-0.0870881	-0.00530538	-0.372787	17.9744
	270	11.8463	0.206419	-0.178402	0.381042	17.4779
	275	-3.87946	0.239567	0.012656	0.419157	15.7267
	280	-3.99285	0.0762428	0.176256	0.262312	14.635
	285	20.9698	-0.132037	0.0526238	-0.472729	16.5205
	290	35.4173	-0.200826	-0.151931	-0.630734	19.2857
	295	10.0099	-0.0819321	-0.208606	-0.375575	18.6942
	300	-12.1257	0.0177244	0.136363	0.0323512	15.3568
	305	2.70042	-0.0600343	0.108414	-0.177297	14.7813
	310	36.2513	-0.0222945	-0.0119708	-0.15225	17.7123
	315	18.62	0.202641	-0.243857	0.299402	18.3275
	320	-11.1336	0.279689	0.169892	0.445514	15.1041
	325	-4.68607	0.0359068	0.214765	0.145218	14.9642
	330	30.9038	-0.243043	0.0506321	-0.554319	17.9104
	335	31.5444	-0.206413	-0.229456	-0.571832	19.7481
	340	2.93692	0.118867	-0.0125856	0.00580678	17.5334
	345	-6.16708	0.00152248	0.0502562	0.217895	14.7825
	350	13.7253	0.0395104	0.0502531	0.239372	15.6943
	355	20.2517	0.0297768	-0.1766	0.0890984	17.4275
	360	6.60032	0.0395626	-0.0926985	0.134924	16.8299
	365	7.17813	-0.0509101	-0.123994	-0.203019	16.9641
	370	17.4954	-0.140429	-0.0367237	-0.443939	17.7445
	375	13.927	-0.0342857	-0.179923	-0.304254	18.0221
	380	8.63949	-0.114721	0.0200996	-0.294978	17.1637
	385	16.6155	-0.0934339	-0.0256473	-0.0818544	16.9345
	390	15.5375	0.0147432	-0.132382	0.21389	17.4659
	395	0.0265862	0.202621	-0.0139518	0.407683	15.7206
	400	1.66424	0.112469	0.0819847	0.379898	15.0821
	405	21.5955	0.0496632	0.0469906	-0.0884663	17.3276
	410	19.6648	-0.11565	-0.242055	-0.287096	18.7305
	415	5.43005	-0.0200848	-0.0688489	-0.229914	17.5219
	420	8.11166	-0.123899	0.0685587	-0.528555	16.9407
	425	19.5374	-0.0180269	0.0179179	-0.29717	17.4248
	430	12.6918	-0.0216336	-0.139578	0.102502	17.4367
	435	3.21295	0.162715	-0.0245664	0.566256	15.9531
	440	11.2976	-0.0178554	0.0416834	0.0951032	16.3269
	445	16.5423	0.0837999	-0.106781	0.0822316	17.6094
	450	6.31507	0.211206	-0.0233325	0.16238	17.1213
