# Supplementary material for: Contrasting responses of summer precipitation to orbital forcing in Japan and China over the past 450 kyr
Source: Copernicus journal article supplement (doi:10.5194/cp-20-2017-2024), 2024-09-16
Supplement: Supplementary file 2 [file cp-20-2017-2024-supplement.zip]

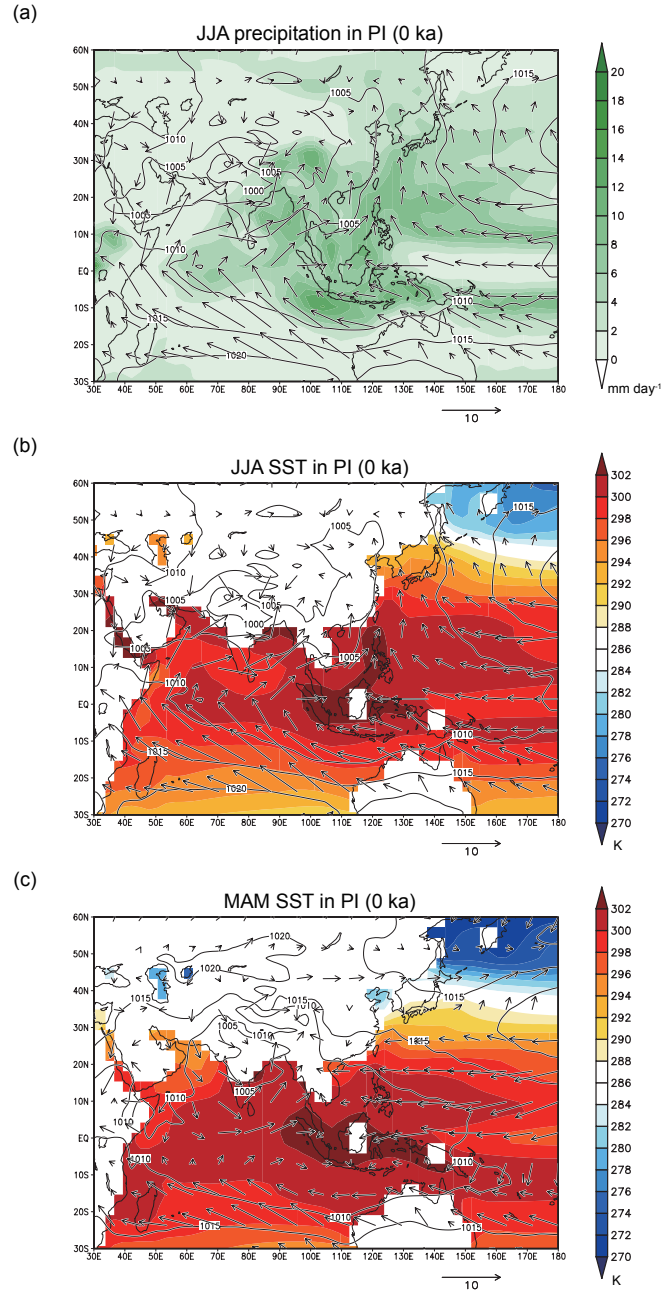

**Figure S1:** (a) Spatial distribution of the JJA precipitation (shading,  $\text{mm day}^{-1}$ ), sea level pressure (contour, hPa), and surface wind (vector,  $\text{m s}^{-1}$ ) in the pre-industrial run (PI; 0 ka). (b) Spatial distribution of the JJA sea surface temperature (shading, K), sea level pressure (contour, hPa), and surface wind (vector,  $\text{m s}^{-1}$ ) in 0 ka run. (c) Spatial distribution of spring (MAM) sea surface temperature (shading, K), sea level pressure (contour, hPa), and surface wind (vector,  $\text{m s}^{-1}$ ) in 0 ka run.

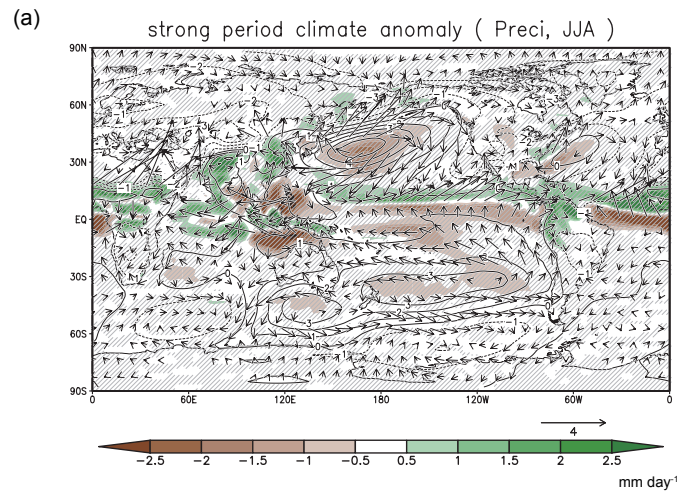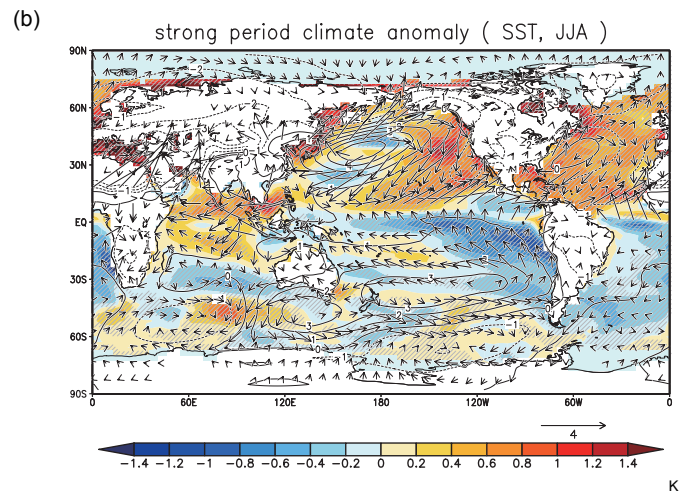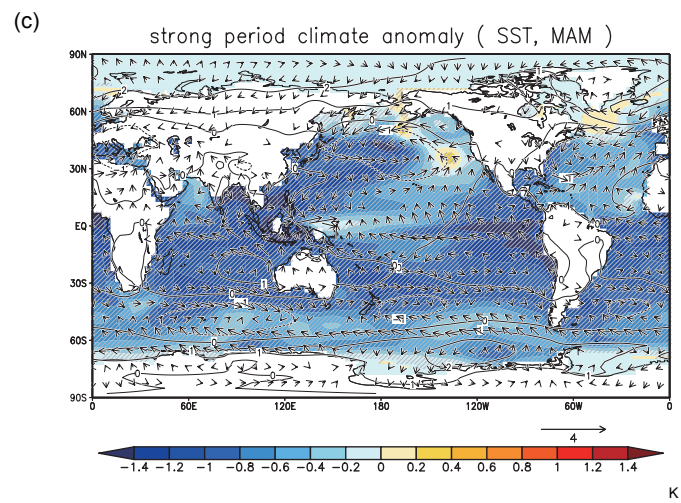

**Figure S2:** **(a)** Spatial distribution of the JJA precipitation (shading,  $\text{mm day}^{-1}$ ), sea level pressure (contour, hPa), and surface wind (vector,  $\text{m s}^{-1}$ ) anomalies in strong periods. Solid and dashed lines denote positive and negative, respectively. Surface wind anomaly under  $0.1 \text{ m s}^{-1}$  is masked. Hatched area denotes regions exceeding a 95 % confidence level using Student's t-test. **(b)** Spatial distribution of the JJA sea surface temperature (shading, K), sea level pressure (contour, hPa), and surface wind (vector,  $\text{m s}^{-1}$ ) anomalies in strong periods. Solid and dashed lines denote positive and negative, respectively. Surface wind anomaly under  $0.1 \text{ m s}^{-1}$  is masked. Hatched area denotes regions exceeding a 95 % confidence level using Student's t-test. **(c)** Spatial distribution of spring (MAM) sea surface temperature (shading, K), sea level pressure (contour, hPa), and surface wind (vector,  $\text{m s}^{-1}$ ) anomalies in strong periods. Solid and dashed lines denote positive and negative, respectively. Surface wind anomaly under  $0.1 \text{ m s}^{-1}$  is masked. Hatched area denotes regions exceeding a 95 % confidence level using Student's t-test.
